# Supplementary material for: ERAP1 deficient mice have reduced Type 1 regulatory T cells and develop skeletal and intestinal features of Ankylosing Spondylitis
Source: PubMed Central journal article supplement (PMC6102283; doi:10.1038/s41598-018-30159-5), 2018-08-20
Supplement: 41598_2018_30159_MOESM1_ESM.pdf [file 41598_2018_30159_MOESM1_ESM.pdf]

# **ERAP1 deficient mice have reduced Type 1 regulatory T cells and develop skeletal and intestinal features of Ankylosing Spondylitis.**

Yuliya Pepelyayeva,<sup>1†</sup> David P.W. Rastall (D.O., Ph.D.),<sup>1†</sup> Yasser A. Aldhamen (Ph.D.),<sup>1</sup> Patrick O'Connell,<sup>1</sup> Sandra Raetz (D.O., Ph.D.),<sup>3</sup> Fadel S. Alyaqoub (Ph.D.),<sup>1</sup> Maja K. Blake,<sup>1</sup> Ashley M. Raedy,<sup>1</sup> Ariana M. Angarita,<sup>1</sup> Abdulraouf M. Abbas,<sup>1</sup> Cristiane N. Pereira-Hicks,<sup>1</sup> Sarah G. Roosa,<sup>1</sup> Laura McCabe (Ph.D.),<sup>3,4,5</sup> Andrea Amalfitano (D.O., Ph.D.),<sup>1,2\*</sup>

<sup>1</sup>Department of Microbiology and Molecular Genetics, <sup>2</sup>Department of Pediatrics, College of Osteopathic Medicine, <sup>3</sup>Department of Physiology; <sup>4</sup>Department of Radiology, and <sup>5</sup>Biomedical Imaging Research Center, Michigan State University, East Lansing, MI 48824

† Denotes equal contribution of coauthors

\* Denotes corresponding author

## Supplemental Figures

### Supplemental Figure 1

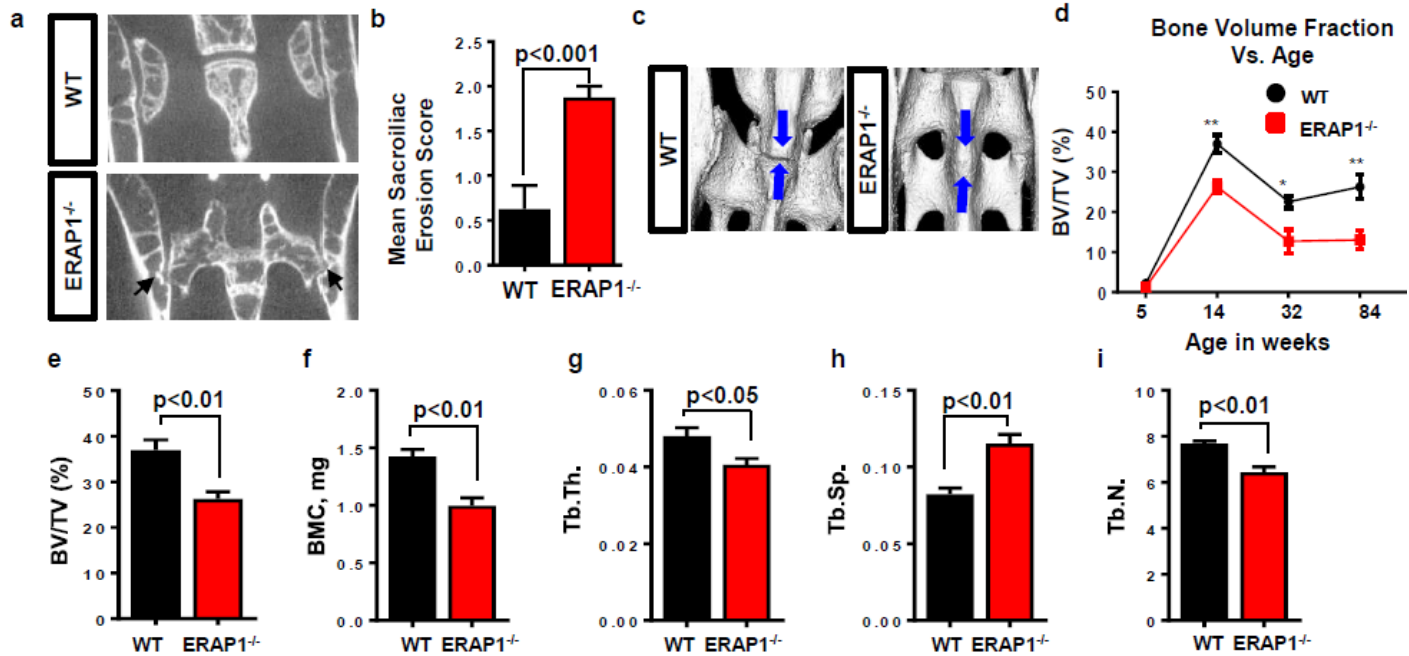

**Supplemental Figure 1.  $\mu$ CT analysis of sacral region.** The spines from 84-week-old female ERAP1<sup>-/-</sup> and WT female mice (n=8) were harvested and analyzed with  $\mu$ CT. **(a)** Representative 2D radiograph demonstrating erosions (**black arrows**) at the SI joint. **(b)** SI joints were assessed for erosions bilaterally, averaged per side and graphed. **(c)** Representative images demonstrating calcification of the anterior longitudinal ligament between L6 and S1 in ERAP1<sup>-/-</sup> animals, depicted with **blue arrows**. The spines from 14-week-old ERAP1<sup>-/-</sup> and WT female mice (n=5) were harvested and analyzed with  $\mu$ CT. **(d)** Graph comparing BV/TV% of the trabecular bone of S1 vertebra between WT and ERAP1<sup>-/-</sup> mice at various ages. Bar graphs demonstrating BV/TV **(e)**, BMC **(f)**, Tb.Th. **(g)**, Tb.Sp. **(h)**, and Tb.N. **(i)** of the trabecular bone of S1 vertebra. Values on graphs are the mean  $\pm$  SEM. p values calculated by student's t-test, where \* - p<0.05 and \*\* - p<0.01 compared to age-matched WT mice.

**Supplemental Figure 2**

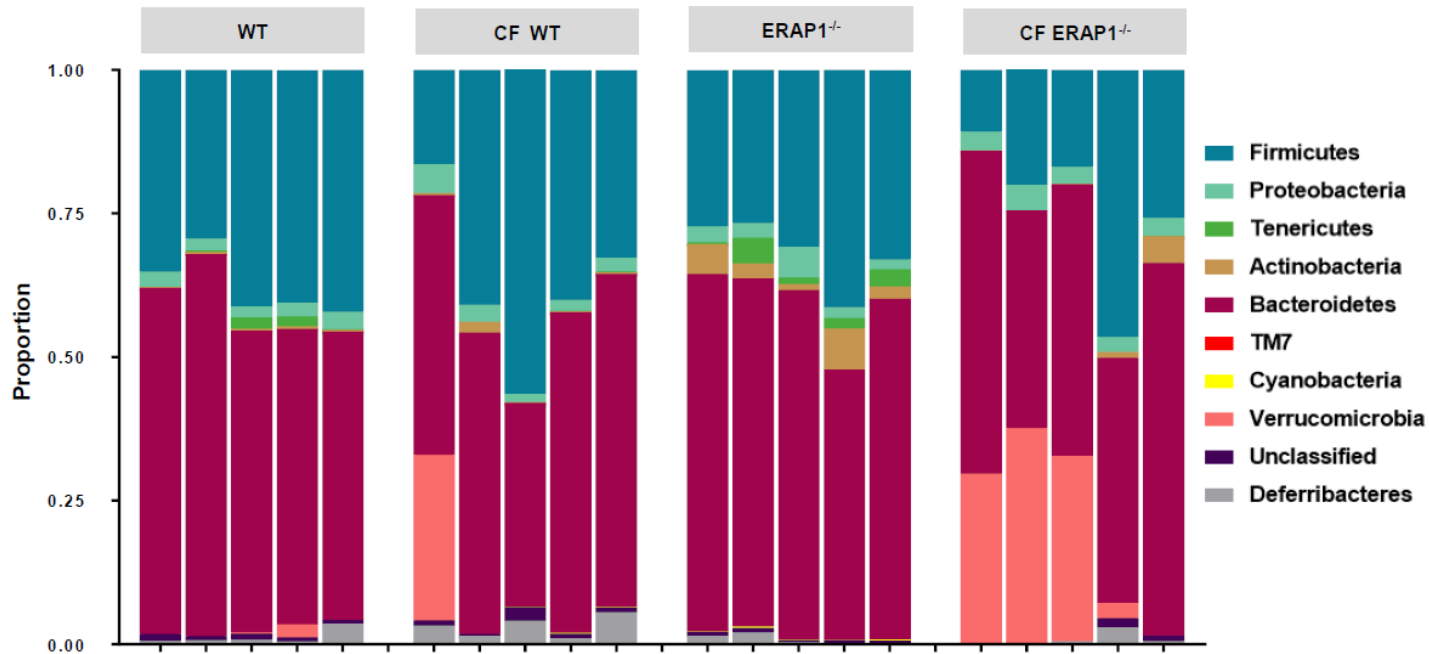

**Supplemental Figure 2. Relative abundance of phyla in WT, CF WT, ERAP1<sup>-/-</sup> and CF ERAP1<sup>-/-</sup> fecal samples.** 16s rRNA phenotyping was performed with illumina on fecal samples of 14-week-old male and female mice (n=5). Stacked bar graph showing relative abundance of phyla in fecal samples of WT, CF WT, ERAP1<sup>-/-</sup>, and CF ERAP1<sup>-/-</sup> mice.

**Supplemental Figure 3**

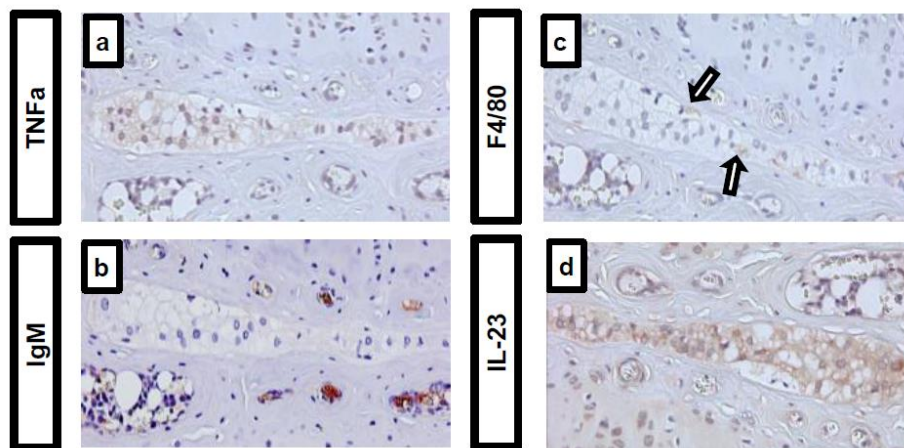

**Supplemental Figure 3. Histopathological analysis of the ankylosed intervertebral joints from CF ERAP1<sup>-/-</sup> mice.** 14-week-old cross-fostered ERAP1<sup>-/-</sup> female and male mice were

sacrificed. Their spines were harvested, fixed, decalcified and stained. Representative immunohistochemistry images of L6/S1 intervertebral disc at 20X magnification for TNF $\alpha$  (a), IgM (b), F4/80 (c), with **arrows** pointing at F4/80+ macrophages, and IL-23 (d).

### Supplemental Table 1

| <b>Supplemental Table 1.</b> Genera that were significantly different between WT and ERAP1 <sup>-/-</sup> mice. |                            |                                                 |                               |
|-----------------------------------------------------------------------------------------------------------------|----------------------------|-------------------------------------------------|-------------------------------|
| Increased in ERAP1 <sup>-/-</sup>                                                                               |                            |                                                 |                               |
| Genus                                                                                                           | WT vs ERAP1 <sup>-/-</sup> | ERAP1 <sup>-/-</sup> vs CF ERAP1 <sup>-/-</sup> | WT vs CF ERAP1 <sup>-/-</sup> |
| Bacteroides                                                                                                     | ****                       | NS                                              | **                            |
| Clostridiales_unclassified                                                                                      | *                          | **                                              | NS                            |
| Odoribacter                                                                                                     | ***                        | ***                                             | NS                            |
| Parabacteroides                                                                                                 | *                          | NS                                              | *                             |
| Prevotella                                                                                                      | ****                       | *                                               | NS                            |
| YS2_unclassified                                                                                                | *                          | *                                               | NS                            |
| Decreased in ERAP1 <sup>-/-</sup>                                                                               |                            |                                                 |                               |
| Genus                                                                                                           | WT vs ERAP1 <sup>-/-</sup> | ERAP1 <sup>-/-</sup> vs CF ERAP1 <sup>-/-</sup> | WT vs CF ERAP1 <sup>-/-</sup> |
| Christensenellaceae_unclassified                                                                                | *                          | NS                                              | *                             |
| Lachnospiraceae_unclassified                                                                                    | **                         | NS                                              | NS                            |
| S24.7_unclassified                                                                                              | *                          | NS                                              | NS                            |

Table summarizing differences of the genus-level OTUs that were found to be significantly increased (top half of the table) or decreased (bottom half of the table) in fecal samples of ERAP1<sup>-/-</sup> mice compared to WT. Differences between ERAP1<sup>-/-</sup> and CF ERAP1<sup>-/-</sup> and WT and CF ERAP1<sup>-/-</sup> mice are summarized in columns 2 and 3, respectively, with arrows representing direction of change in CF ERAP1<sup>-/-</sup> fecal samples. p values calculated by student's t-test, where \* - p<0.05, \*\* - p<0.01, \*\*\* - p<0.001, \*\*\*\* - p<0.0001 and NS - not significant.

**Supplemental Table 2. Details of antibodies used for Immunohistochemistry staining.**

| Primary Antibody                       | Ab Vendor:                                      | Pretreatment:                                       | Primary:                     | Staining System:                                                                                                                        |
|----------------------------------------|-------------------------------------------------|-----------------------------------------------------|------------------------------|-----------------------------------------------------------------------------------------------------------------------------------------|
| Rabbit anti – IL23<br>Polyclonal       | Abcam<br>#115759<br>Cambridge,<br>MA            | 0.03% Pronase E in<br>TBS for 10 minutes at<br>37°C | 1:100 in NAD<br>– 2 Hours    | ProMark Rabbit on Rodent HRP<br>Polymer™ - 30 minutes<br>AEC – 5 minutes<br>CATHE Hematoxylin 1:10 – 1 minute                           |
| Rat anti – F4/80<br>Monoclonal         | Bio-Rad #<br><i>MCA497G</i><br>Hercules, CA     | Overnight Retrieval<br>overnight at 56°C            | 1:100 in NAD<br>Overnight    | ProMark Rat on Mouse HRP Polymer™<br>15 minutes – Probe<br>15 minutes – Polymer<br>AEC – 5 minutes<br>CATHE Hematoxylin 1:10 – 1 minute |
| Rabbit anti – IgM<br>Polyclonal        | ThermoFisher<br>#61-6800<br><i>Rockford, IL</i> | Overnight Retrieval<br>overnight at 56°C            | 1:300 in NAD<br>– 60 minutes | ProMark Rabbit on Rodent HRP<br>Polymer™ - 30 minutes<br>AEC – 5 minutes<br>CATHE Hematoxylin 1:5 – 5 minutes                           |
| Rabbit anti-TNF<br>alpha<br>Polyclonal | Abcam #6671<br>Cambridge,<br>MA                 | Overnight Retrieval<br>overnight at 56°C            | 1:100 in NAD<br>– 2 Hours    | ProMark Rabbit on Rodent HRP<br>Polymer™ - 30 minutes<br>AEC – 5 minutes<br>CATHE Hematoxylin 1:10 – 1 minute                           |
